# Supplementary material for: Crystal structures of SAMHD1 inhibitor complexes reveal the mechanism of water-mediated dNTP hydrolysis
Source: PubMed Central journal article supplement (PMC7311409; doi:10.1038/s41467-020-16983-2), 2020-06-23
Supplement: 41467_2020_16983_MOESM1_ESM.pdf [file 41467_2020_16983_MOESM1_ESM.pdf]

## Supplementary information

### Crystal structures of SAMHD1 inhibitor complexes reveal the mechanism of water-mediated dNTP hydrolysis

Elizabeth R. Morris et al.

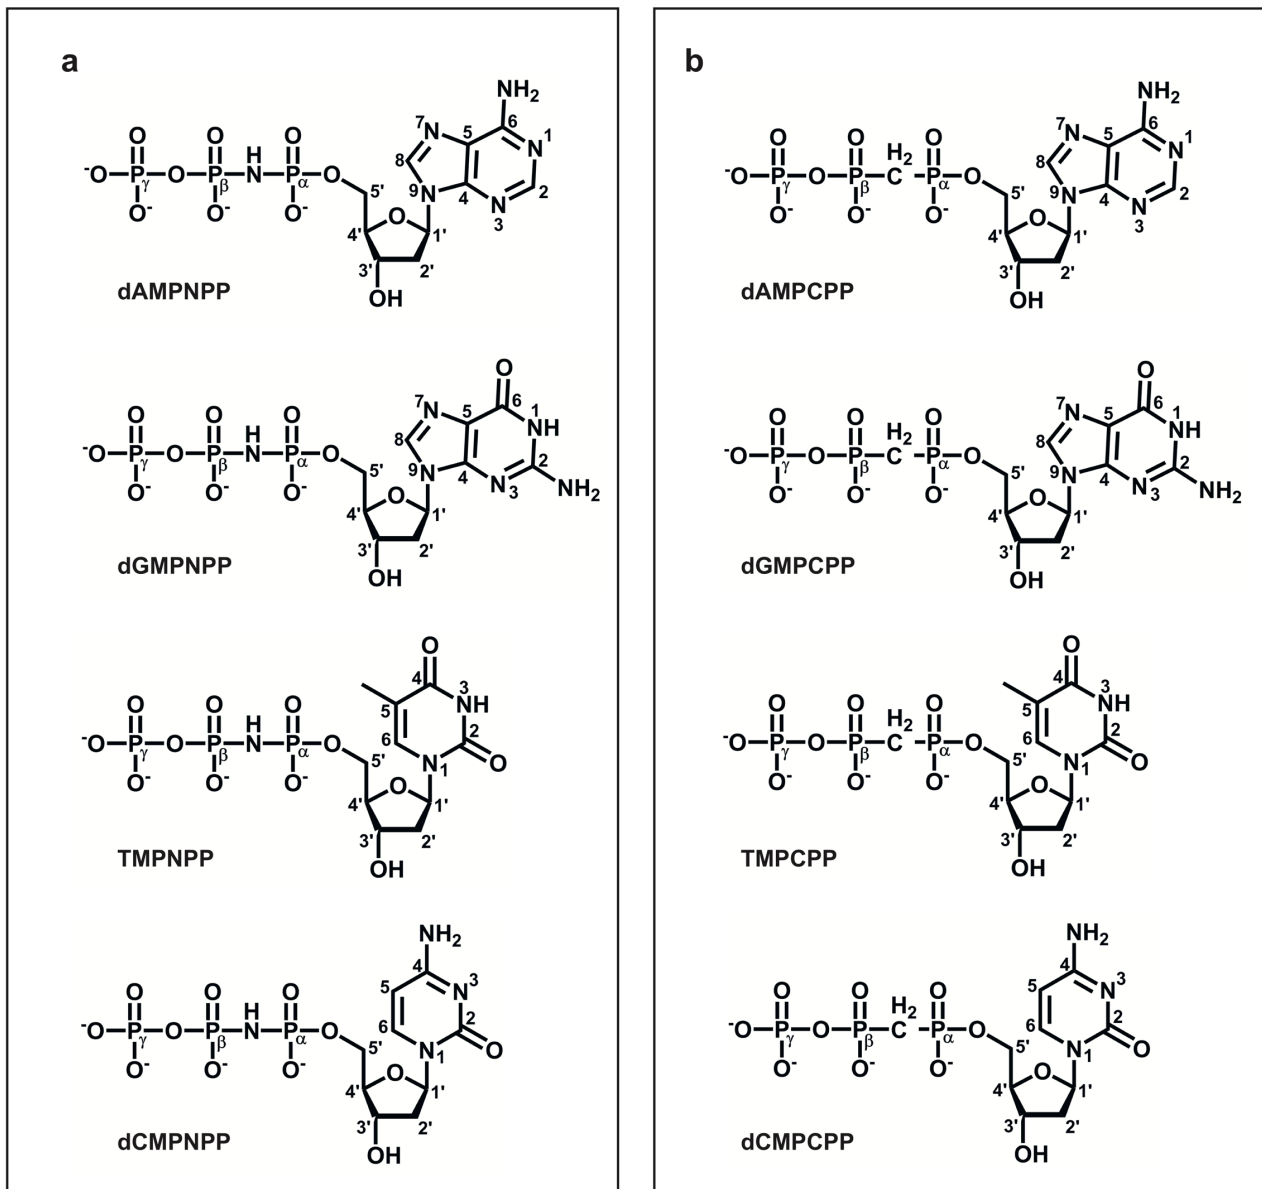

**Supplementary Fig. 1. Chemical structures of deoxynucleotide analogues.** Diagrammatic representations of the chemical structures of the (a)  $\alpha,\beta$  imido (dNMPNPP) and (b)  $\alpha,\beta$  methyleno (dNMPCPP) dNTP analogues employed in this study. Base and sugar carbon and nitrogen atoms are numbered using the standard convention for purine- and pyrimidine-based nucleotides.

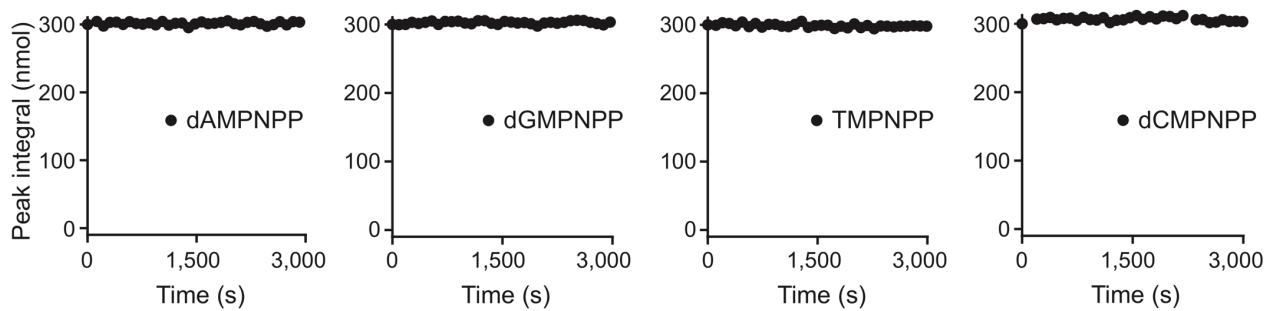

**Supplementary Fig. 2. dNMPNPP analogues are not hydrolysed by SAMHD1.**  $^1\text{H}$  NMR Data recorded from a SAMHD1 hydrolysis reaction containing  $1\ \mu\text{M}$  SAMHD1,  $0.2\ \text{mM}$  GTP activator and  $0.5\ \text{mM}$  of dAMPNPP, dGMPNPP, TMPNPP or dCMPNPP. In each panel, the integrated area of resolved resonances from each dNMPNPP analogue is plotted against time. No significant reduction in peak intensities is apparent, indicating there is no hydrolysis.

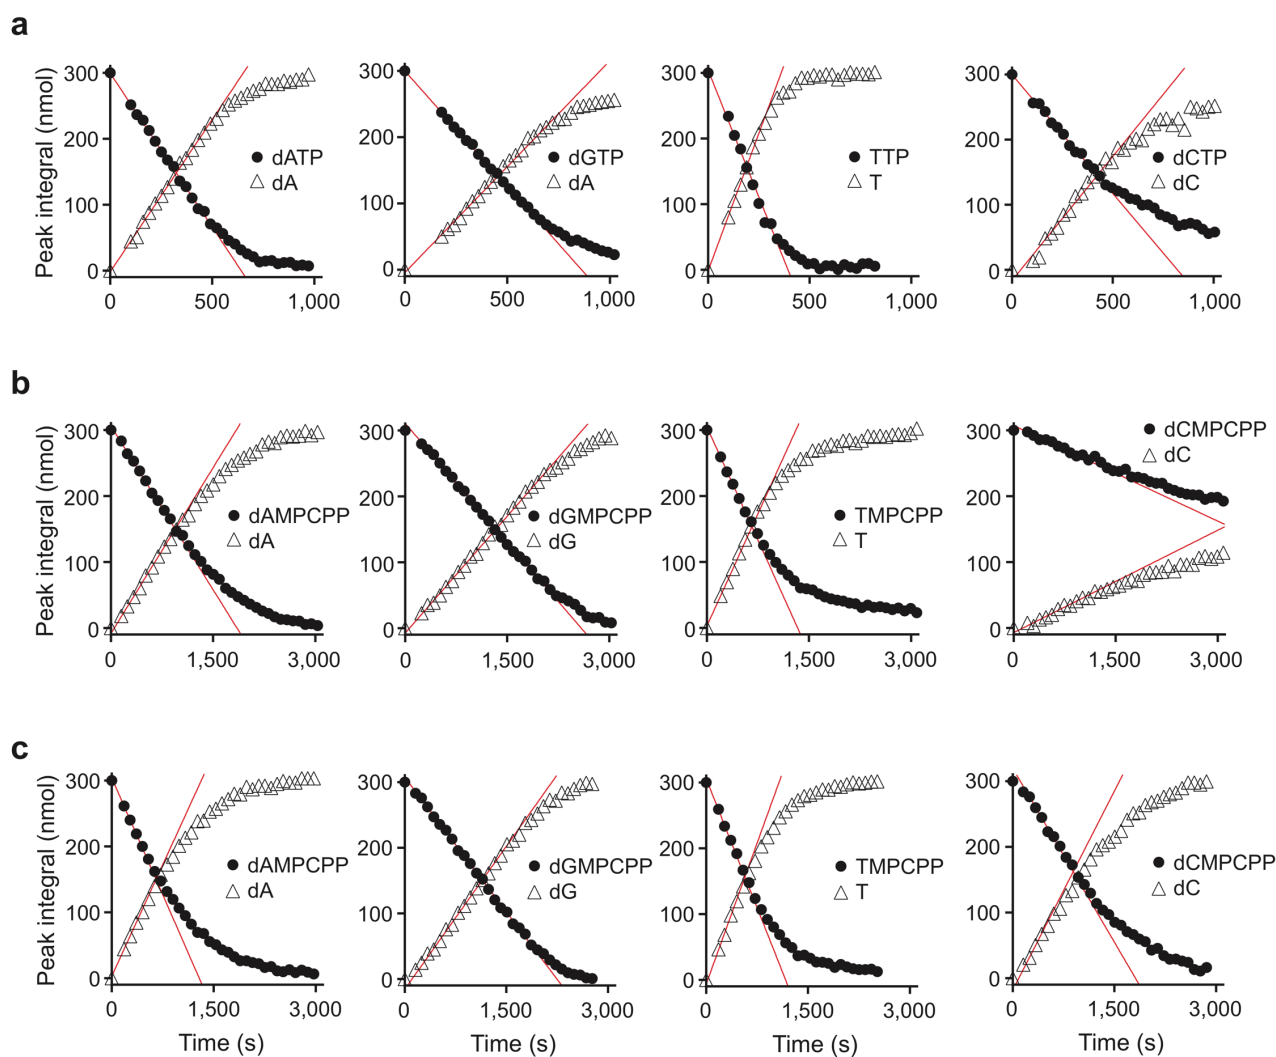

**Supplementary Fig. 3.  $^1\text{H}$  NMR analysis of SAMHD1 hydrolysis of dNMP CPP nucleotides. a,  $^1\text{H}$  NMR**

Data recorded for SAMHD1 hydrolysis reactions containing  $1\ \mu\text{M}$  SAMHD1,  $0.2\ \text{mM}$  GTP AL1-activator and  $0.5\ \text{mM}$  of deoxynucleotides dATP, dGTP, TTP or dCTP. **b**, Data recorded for reactions containing  $1\ \mu\text{M}$  SAMHD1,  $0.2\ \text{mM}$  GTP AL1-activator and  $0.5\ \text{mM}$  of dAMPCPP, dGMPCPP, TMPCPP or dCMPCPP. **c**, Data recorded for reactions containing  $1\ \mu\text{M}$  SAMHD1,  $0.2\ \text{mM}$  GTP activator,  $0.01\ \text{mM}$  dATP AL2-activator and  $0.5\ \text{mM}$  dAMPCPP, dGMPCPP, TMPCPP or dCMPCPP. In each panel, the integral of resolved substrate and product peak resonances from each deoxynucleoside is plotted against time. Initial rates of hydrolysis were determined from slopes (red lines) derived from the data measured in the linear phase of the reaction.



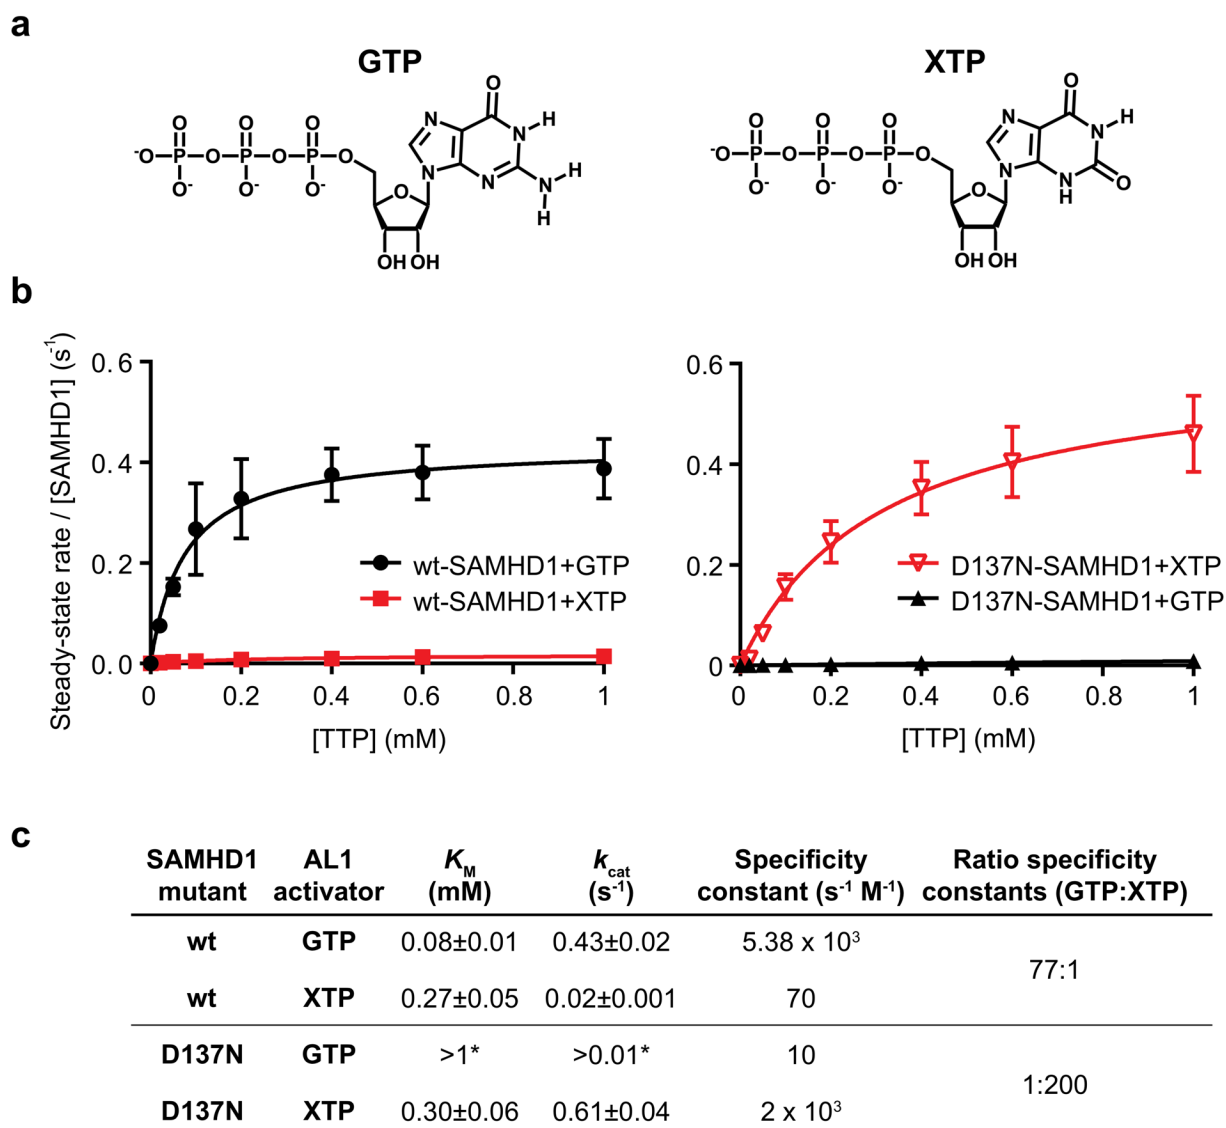

**Supplementary Fig. 4. AL1 specificity and catalytic activity of SAMHD1(D137N).** **a**, Diagrammatic representations of the chemical structures of GTP and XTP. **b**, Comparison of the steady-state kinetics of GTP- and XTP-stimulated hydrolysis of TTP by wt-SAMHD1 and SAMHD1(D137N) using the SAMHD1-Ppx1 continuous coupled enzyme assay. The dependence of the rate on substrate concentration for wt-SAMHD1 (left) and the D137N-SAMHD1 (right) are plotted. The solid lines, black (GTP-stimulated) and red (XTP-stimulated) are the best fit to the data using the Michaelis-Menten expression. Error bars represent the standard deviation of at least three independent measurements. **c**, Steady-state kinetic parameters derived from the data in **b**, values marked with

asterisks are minimum estimates from data fitting. The ratio of specificity constants is the fold increase or decrease in the catalytic specificity constants for GTP relative to XTP for the wt and D137N proteins. Source data for **b** and **c** are provided in the Source Data file.

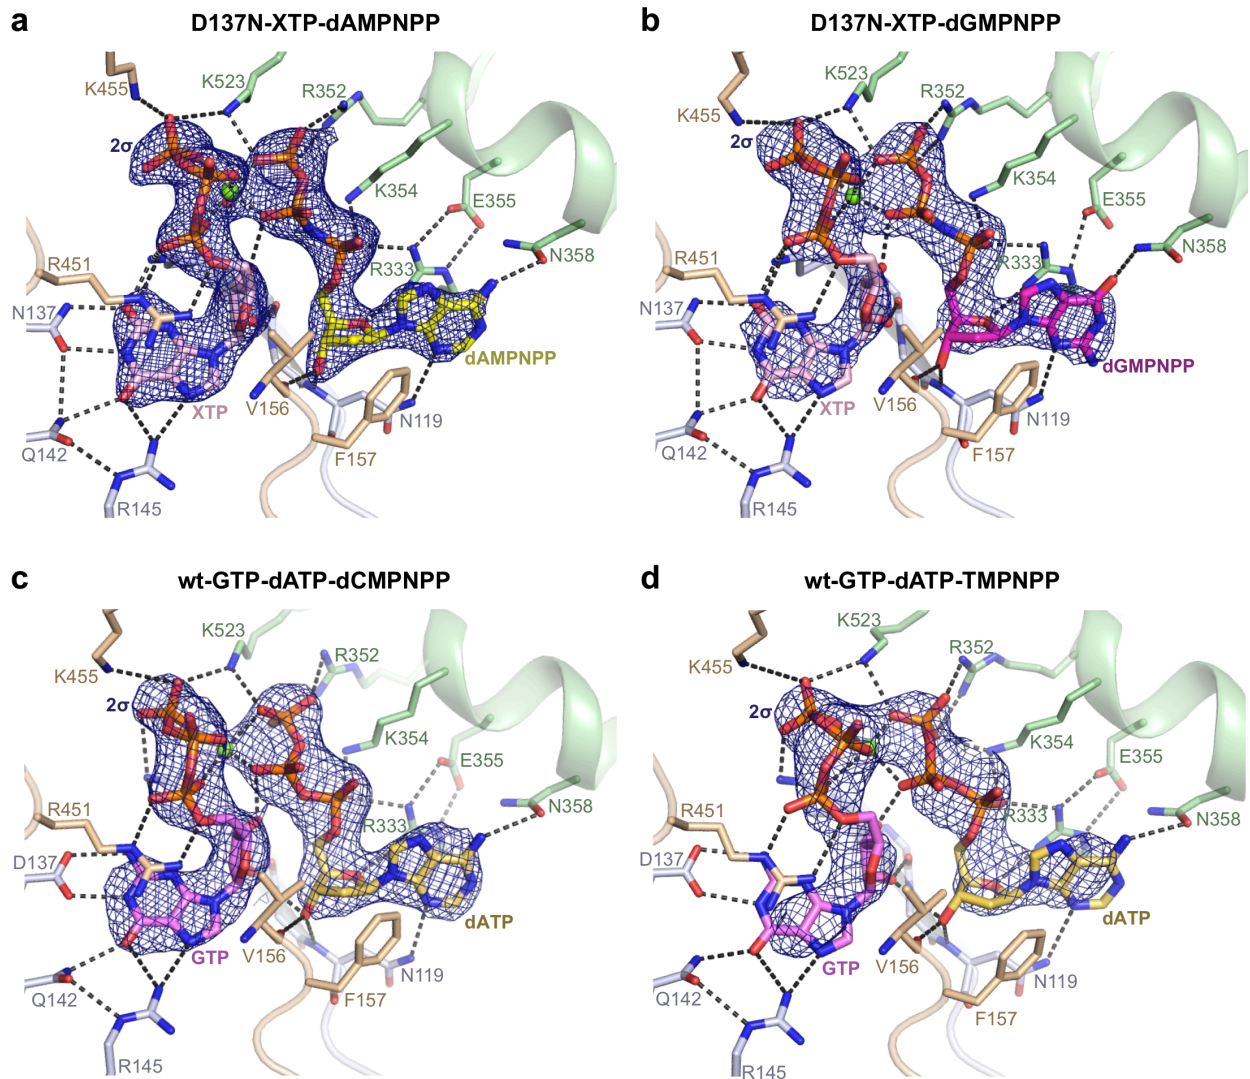

**Supplementary Fig. 5. Density for metal ions and nucleotides bound at the allosteric sites.**  $2F_o - F_c$  electron density for allosteric site bound nucleotides in SAMHD1 crystal structures. (a) D137N-XTP-dAMPNPP, (b) D137N-XTP-dGMPNPP, (c) wt-GTP-dATP-dCMPNPP and (d) wt-GTP-dATP-TMPNPP. The protein backbone is shown in cartoon and the  $2F_o - F_c$  simulated annealing composite omit map is shown as a blue mesh, contoured at  $2.0\sigma$ . Nucleotides and residues surrounding AL1 and AL2 are shown in stick representation, Mg ions are shown as green spheres. Hydrogen and coordinate bonds are displayed as dashed grey lines.

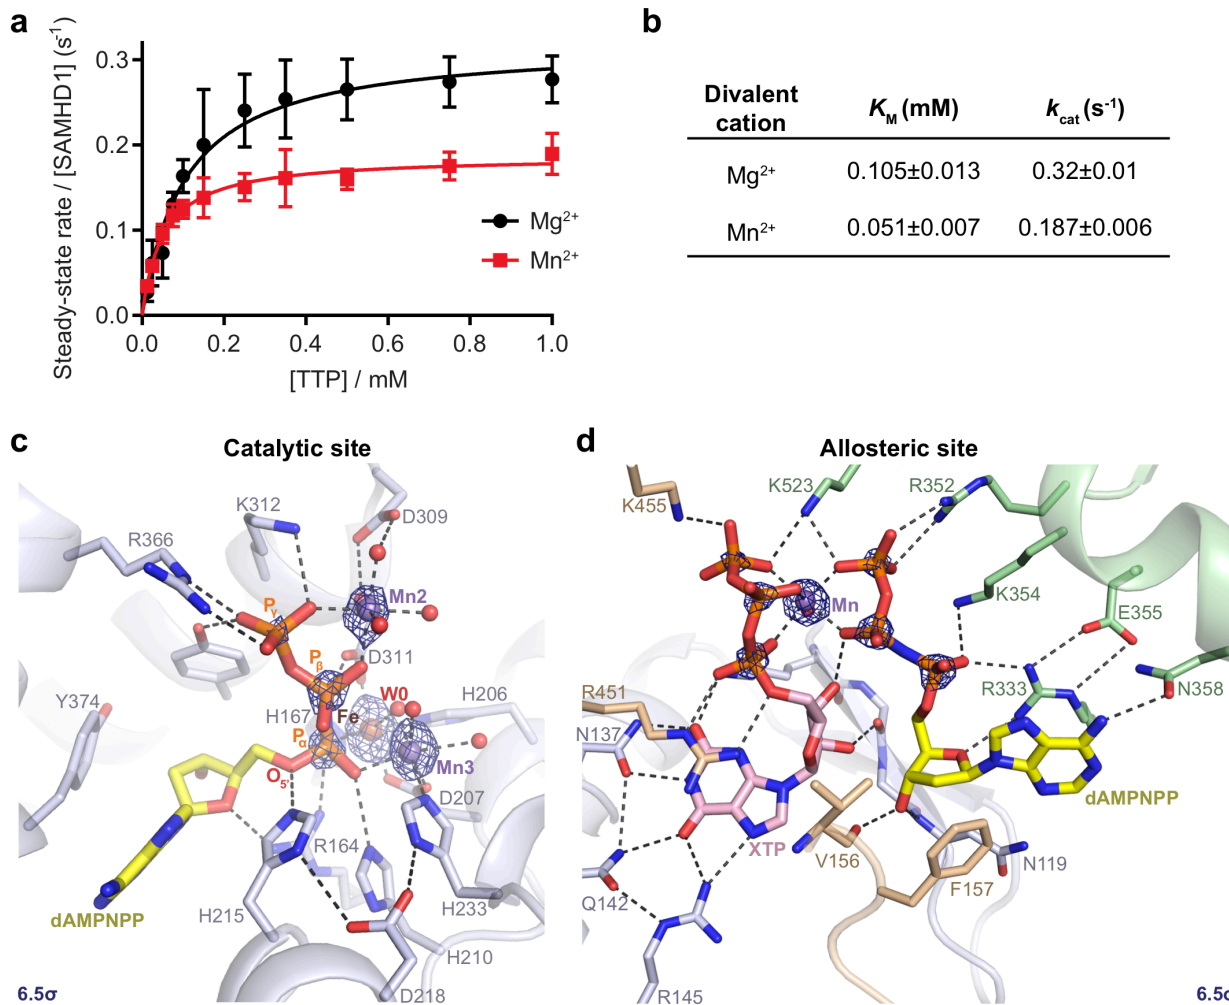

**Supplementary Fig. 6.  $Mg^{2+}$ - and  $Mn^{2+}$ -activated SAMHD1 dNTP hydrolysis.** **a**, Comparison of the steady-state kinetics of GTP-stimulated hydrolysis of TTP by wt-SAMHD1 in the presence of either  $Mg^{2+}$  or  $Mn^{2+}$  divalent cations. Enzyme activity was measured using the SAMHD1-Ppx1 continuous coupled enzyme assay. The dependence of the rate on substrate concentration for  $Mg^{2+}$ -stimulated (black) and  $Mn^{2+}$ -stimulated (red) are plotted. The solid lines are the best fit to the data using the Michaelis-Menten expression. Error bars represent the standard deviation of at least two independent measurements. **b**, Steady-state kinetic parameters  $K_M$  and  $k_{cat}$  derived from the data in **a**, source data for **a** and **b** are provided in the Source Data file. **c & d**, The regions surrounding the active (**c**) and (**d**) allosteric sites are shown for the D137N-SAMHD1(109-626)-XTP- $dAMPNPP$  complex crystallised in the presence of 5 mM  $MnCl_2$  with the 2Fo-Fc simulated annealing composite

omit map contoured at  $6.5\sigma$  shown as blue mesh. Metal ions are shown as spheres coloured by atom type (Fe, brown; Mn, purple), the protein backbone is shown in cartoon representation, bound nucleotides and surrounding residues are shown as sticks and hydrogen and co-ordinate bonds as dashed lines.

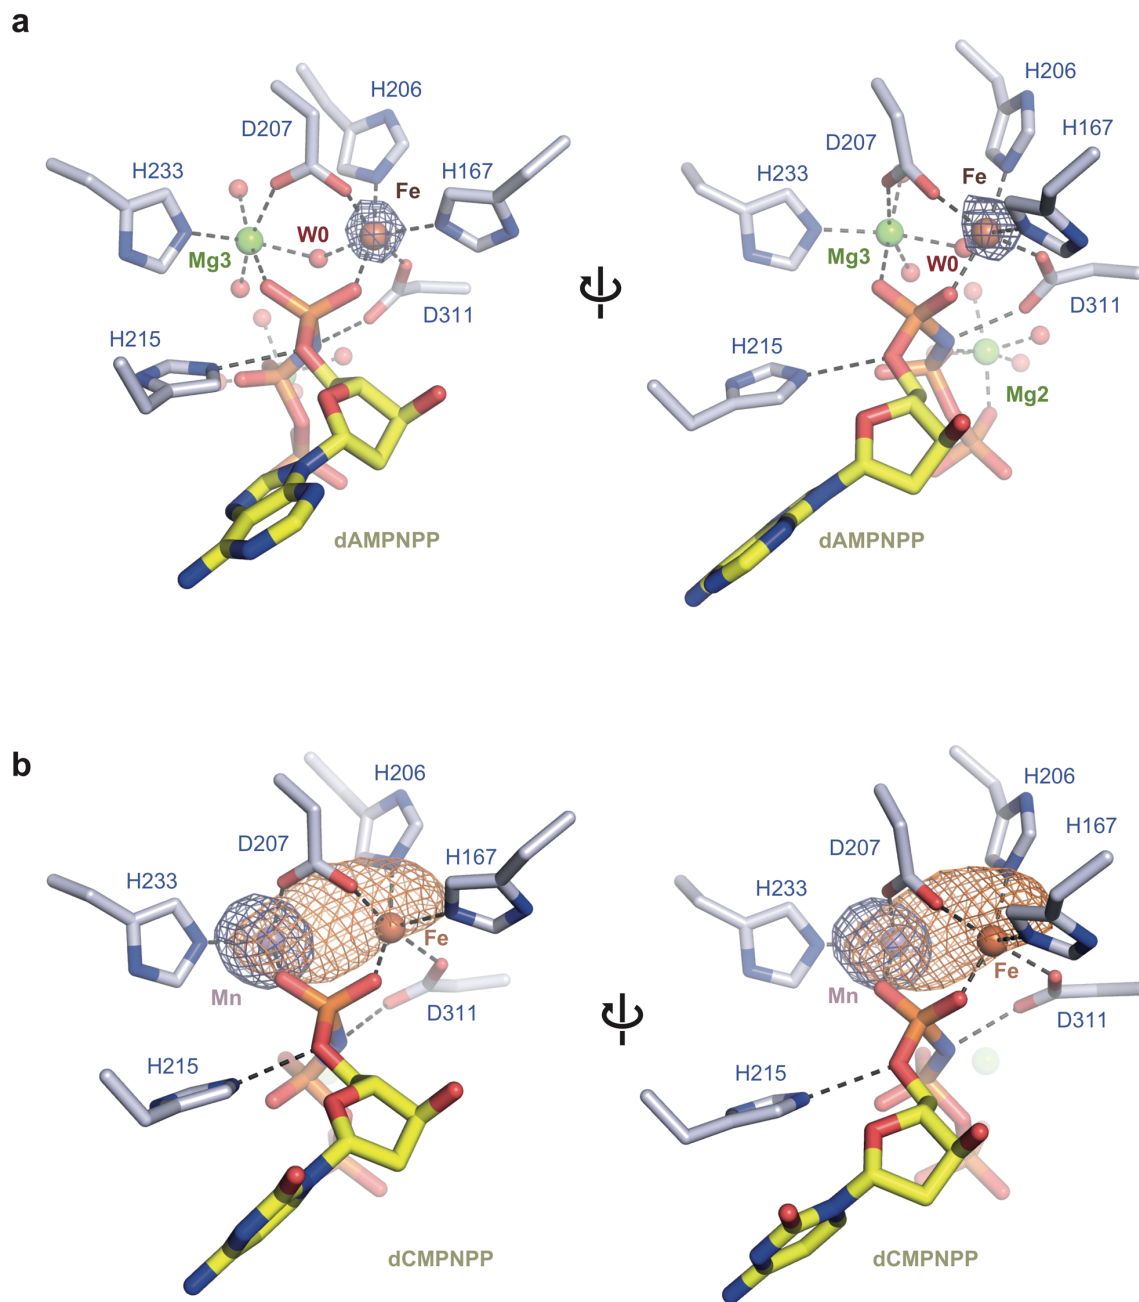

**Supplementary Fig. 7. Anomalous scattering of active site metal ions.** **a**, View of the bi-metallic centre in the active site of the D137N-XTP-dAMPNPP-Mg inhibitor complex. The anomalous difference electron density calculated from a dataset recorded at 0.93 Å is shown as blue mesh, contoured at 4  $\sigma$ . **b**, Anomalous difference density for active site metals recorded from crystals of a D137N-XTP-dATP-dCMPNPP-Mn-Mg inhibitor complex. The anomalous difference density calculated from datasets recorded at the Mn 1.8929 Å and Fe 1.7404 Å absorbance edges is shown

as blue and brown mesh respectively, contoured at  $8 \sigma$  and  $2.2 \sigma$  respectively. The views in **a** and **b** are the same orientation as in **Fig. 4a**. Nucleotides and co-ordinating side chains are shown in stick representation with metal ions and co-ordinated water molecules are shown as spheres, coloured by atom type.

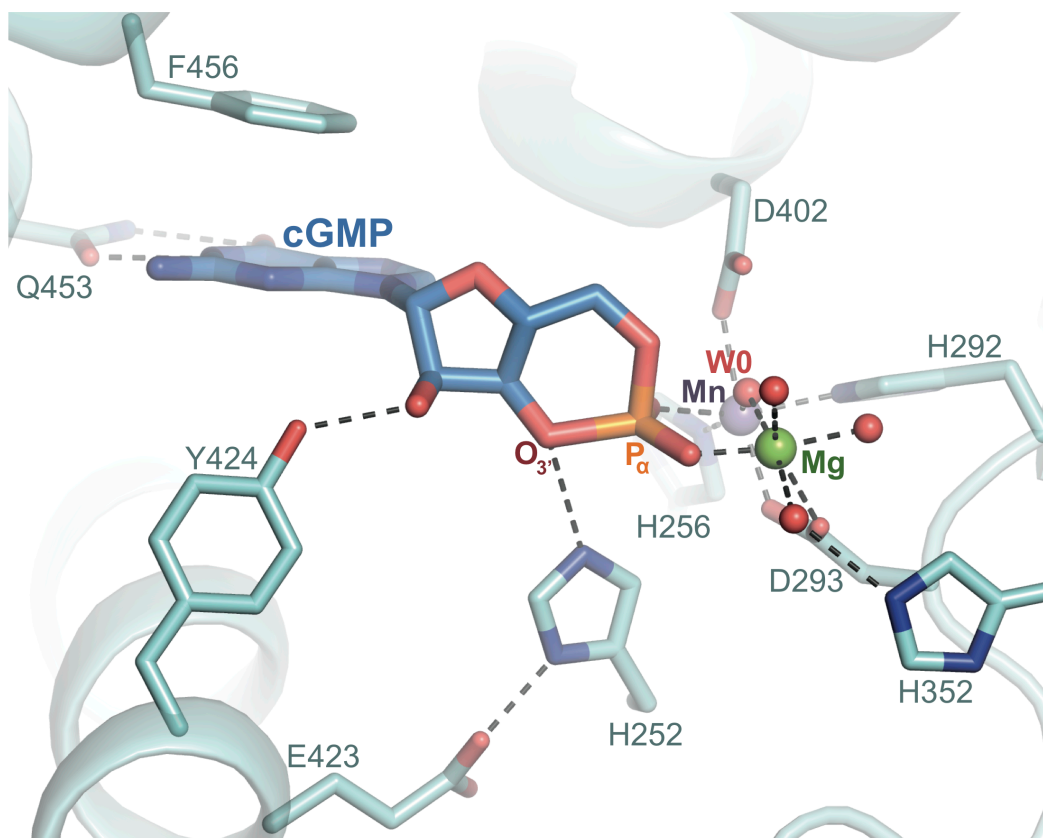

**Supplementary Fig. 8. Human PDE9 active site.** Close up view of the active site of human PDE9-cGMP complex (PDB ID: 3DYL). The protein backbone is shown in cartoon representation, metal ions and water molecules as spheres. The bound cGMP nucleotide substrate and residues that make interactions with the substrate and active site metal ions are shown as sticks. Hydrogen and coordinate bonds are displayed as dashes. W0 is the in-line attacking nucleophilic water. His252 and Glu423 in PDE9 are equivalent to His215 and Asp218 in SAMHD1 which we propose act in a proton relay as a general acid to protonate the O<sup>5'</sup> of the nucleoside leaving group.



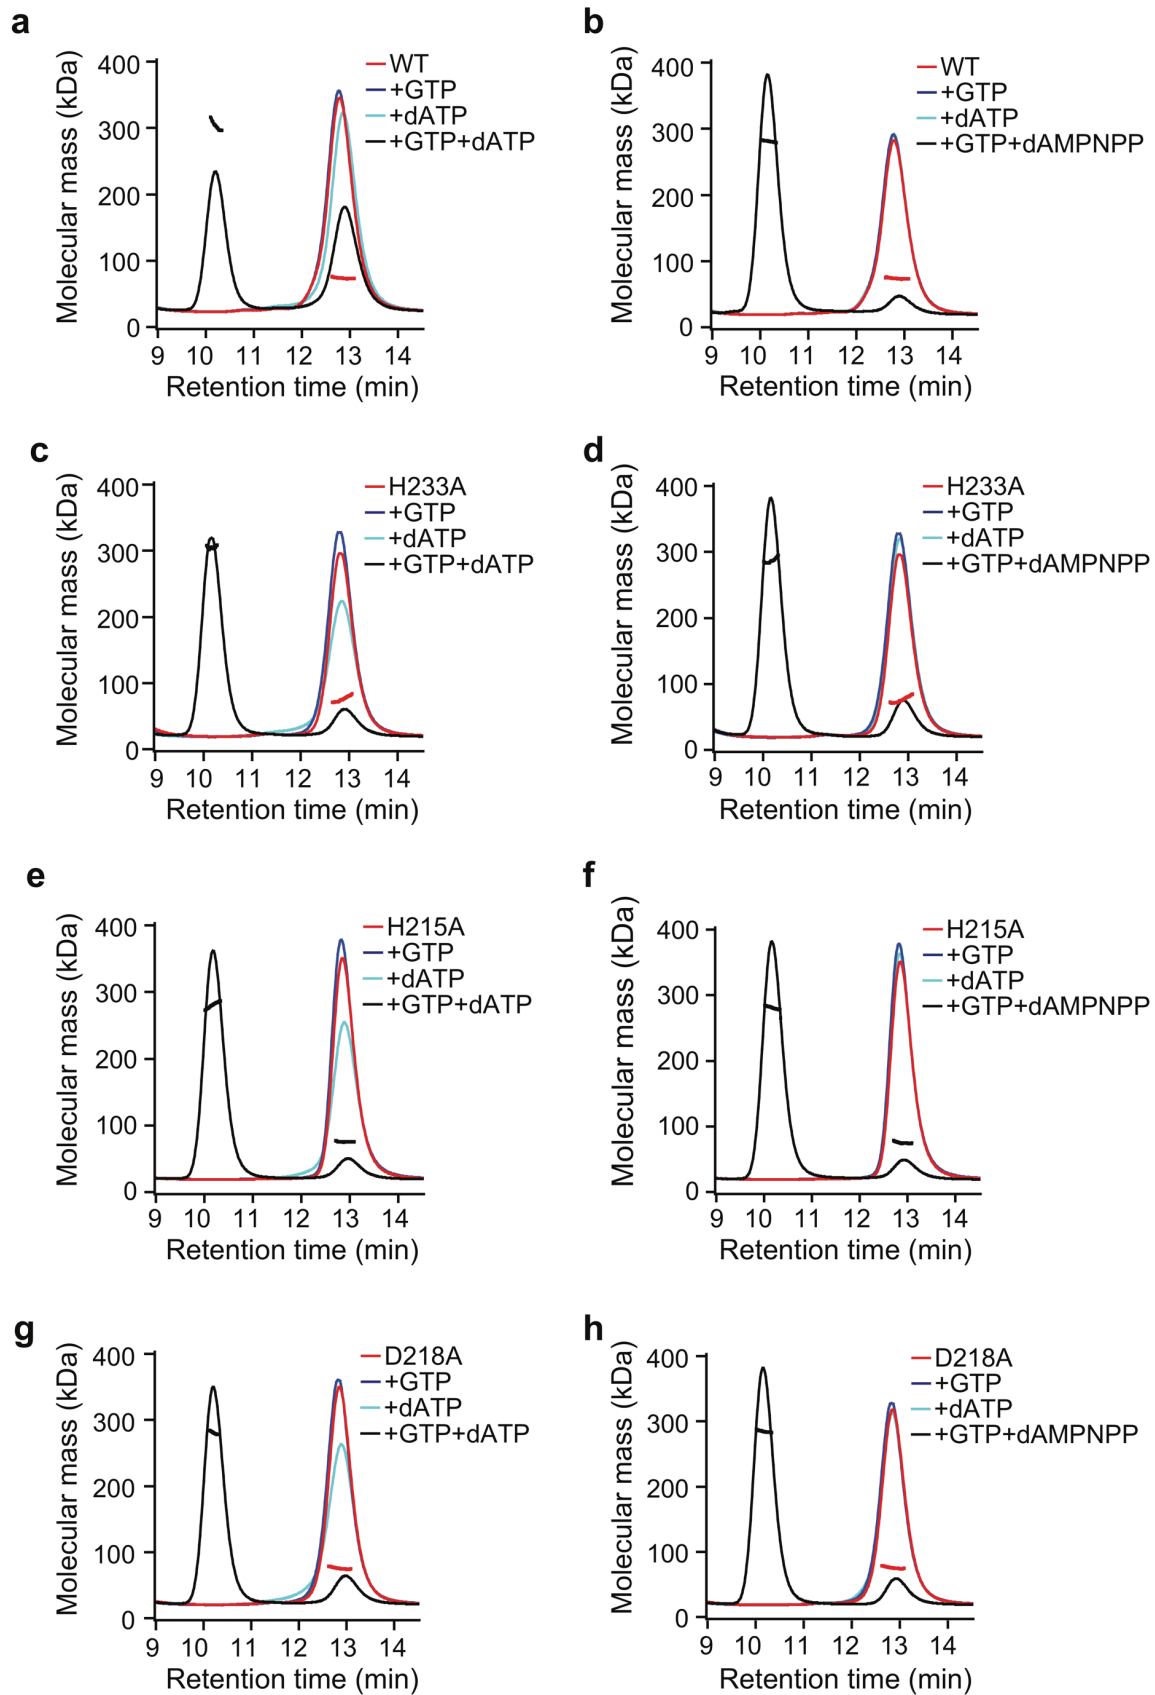

**Supplementary Fig. 9. Tetramerisation of active site mutants.** SEC-MALLS analysis of monomer-dimer-tetramer equilibrium of wt-SAMHD1 (a & b) and active site mutants H233A (c & d), H215A (e

**& f)** and D218A (**g & h**) upon addition of dATP and dAMPNPP nucleotides, respectively. In each panel, the solid lines are the chromatograms from the output of the differential refractometer and the black scatter points are the weight-averaged molar masses determined at 1-second intervals throughout elution of chromatographic peaks. The curves shown are: (red) apo-SAMHD1; (blue) SAMHD1 and 0.2 mM GTP; (cyan) SAMHD1 and 0.5 mM indicated dATP or dAMPNPP; and (black) SAMHD1, 0.2 mM GTP and 0.5 mM indicated dATP or dAMPNPP. All mutants induce SAMHD1 tetramerisation, despite catalytic deficiency.

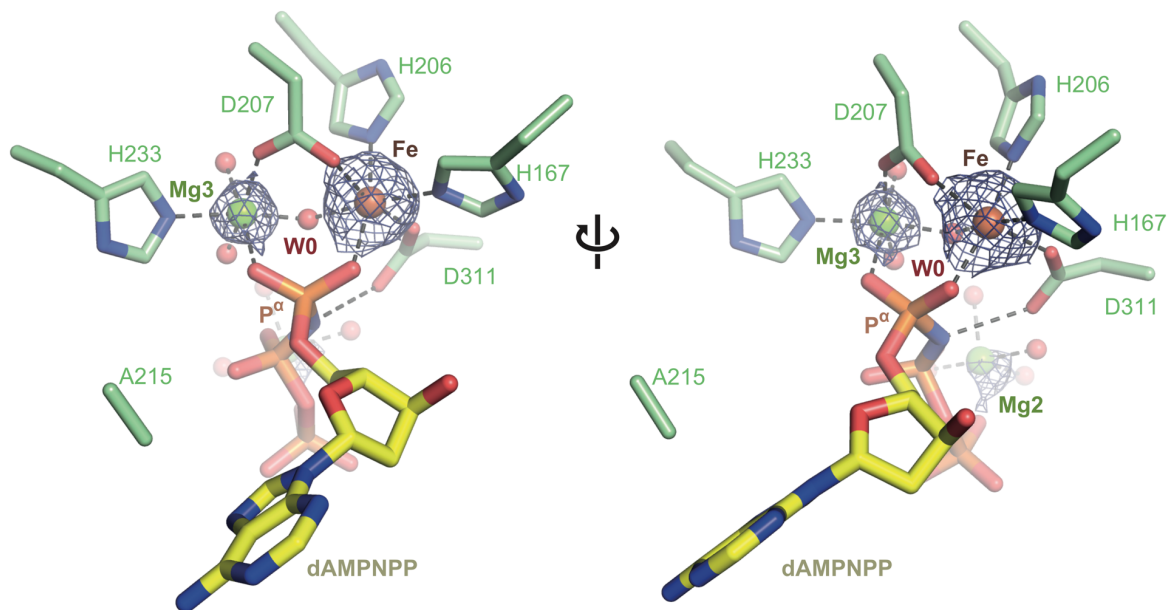

**Supplementary Fig. 10. Active site of H215A-SAMHD1(109-626)-GTP-dAMPNPP inhibitor complex.**

View of the bi-metallic centre in the active site of the H215A-SAMHD1(109-626)-GTP-dAMPNPP inhibitor complex with electron density for bound metal ions. Nucleotides are shown in stick representation. Metal ions and co-ordinated water molecules are shown as spheres, coloured by atom type as in **Fig 6c**. Hydrogen bonding and metal ion co-ordinate bonds are shown as dashed lines. The electron density (blue mesh) for the Fe, Mg2 and Mg3 ions is the simulated-annealing composite omit 2Fo – Fc map, contoured at 3.3  $\sigma$ .

**Supplementary Table 1. dNMPNPP inhibition of SAMHD1**

| <b>dNTP analogue</b> | <b>AL1 Activator</b> | <b>Substrate</b> | <b><math>K_i</math> (<math>\mu\text{M}</math>)</b> |
|----------------------|----------------------|------------------|----------------------------------------------------|
| dAMPNPP              | GTP                  | TTP              | $0.78 \pm 0.06$                                    |
| dGMPNPP              | GTP/dGMPNPP          | TTP              | $0.052 \pm 0.002$                                  |
| TMPNPP               | GTP                  | TTP              | $0.37 \pm 0.02$                                    |
| dCMPNPP              | GTP                  | TTP              | $0.073 \pm 0.003$                                  |

**Supplementary Table 2. Catalytic turnover of dNTPs and dNMPCPP analogues**

| <b>Substrate</b> | <b>AL2 Activator</b> | <b>AL1 Activator</b> | <b><math>k_{cat}</math> (s<sup>-1</sup>)</b> |
|------------------|----------------------|----------------------|----------------------------------------------|
| dATP             | dATP                 | GTP                  | 0.86±0.09                                    |
| dGTP             | dGTP                 | GTP / dGTP           | 0.66±0.15                                    |
| TTP              | TTP                  | GTP                  | 1.43±0.07                                    |
| dCTP             | dCTP                 | GTP                  | 0.57±0.11                                    |
| dAMPCPP          | dAMPCPP              | GTP                  | 0.21±0.09                                    |
| dGMPCPP          | dGMPCPP              | GTP / dGMPCPP        | 0.26±0.08                                    |
| TMPCPP           | TMPCPP               | GTP                  | 0.38±0.01                                    |
| dCMPCPP          | dCMPCPP              | GTP                  | 0.075±0.008                                  |
| dAMPCPP          | dAMPCPP / dATP*      | GTP                  | 0.35±0.04                                    |
| dGMPCPP          | dGMPCPP / dATP*      | GTP / dGMPCPP        | 0.23±0.04                                    |
| TMPCPP           | TMPCPP / dATP*       | GTP                  | 0.44±0.09                                    |
| dCMPCPP          | dCMPCPP / dATP*      | GTP                  | 0.21±0.06                                    |

\*Reactions were supplemented with 10  $\mu$ M dATP as an additional AL2 activator

**Supplementary Table 3. X-ray data collection and structure refinement statistics**

|                                                    | D137N-SAMHD1<br>Mg, XTP,<br>dAMPNPP | D137N-SAMHD1<br>Mg, XTP,<br>dAMPNPP<br>(STARANISO) | D137N-SAMHD1<br>Mg, XTP,<br>dGMPNPP | D137N-SAMHD1<br>Mg, XTP,<br>dGMPNPP<br>(STARANISO) |
|----------------------------------------------------|-------------------------------------|----------------------------------------------------|-------------------------------------|----------------------------------------------------|
| <b>Data collection</b>                             |                                     |                                                    |                                     |                                                    |
| Space group                                        | P 4 <sub>3</sub> 2 <sub>1</sub> 2   | P 4 <sub>3</sub> 2 <sub>1</sub> 2                  | P 2 <sub>1</sub>                    | P 2 <sub>1</sub>                                   |
| Cell dimensions                                    |                                     |                                                    |                                     |                                                    |
| a, b, c (Å)                                        | 105.9, 105.9, 198.1                 | 105.9, 105.9, 198.1                                | 97.8, 173.0, 276.0                  | 97.8, 172.9, 275.9                                 |
| α, β, γ                                            | 90, 90, 90                          | 90, 90, 90                                         | 90, 95.2, 90                        | 90, 95.2, 90                                       |
| Wavelength (Å)                                     | 0.92819                             | 0.92819                                            | 0.96861                             | 0.96861                                            |
| Resolution (Å)                                     | 72.32(2.44)-2.40                    | 72.34(2.26)-2.01                                   | 137.41(3.36)-3.30                   | 146.33(3.20)-2.85                                  |
| Anisotropic diff. limits                           |                                     |                                                    |                                     |                                                    |
| a*, b*, c* (Å)                                     | -                                   | 2.57, 2.57, 1.98                                   | -                                   | 3.44, 3.39, 2.84                                   |
| Unique reflections                                 | 44,919 (2,202) <sup>†</sup>         | 45,483 (2,274)                                     | 137,345 (6,691)                     | 140,978 (7,049)                                    |
| R <sub>meas</sub> (%)                              | 11.9 (123)                          | 12.0 (126)                                         | 20.2 (61.2)                         | 22.0 (68)                                          |
| R <sub>pim</sub> (%)                               | 3.9 (42)                            | 3.9 (42)                                           | 10.8 (32.8)                         | 11.7 (36)                                          |
| CC <sub>1/2</sub>                                  | 0.999 (0.790)                       | 0.999 (0.674)                                      | 0.948 (0.765)                       | 0.980 (0.729)                                      |
| I/σ(I)                                             | 11.4 (1.7)                          | 14.3 (2.0)                                         | 5.8 (2.3)                           | 4.0 (1.5)                                          |
| Completeness                                       |                                     |                                                    |                                     |                                                    |
| Spherical (%)                                      | 100 (100)                           | 59.8 (10.2)                                        | 99.77 (97.34)                       | 66.5 (11.4)                                        |
| Ellipsoidal (%)                                    | -                                   | 95.6 (78.8)                                        | -                                   | 94.3 (67.3)                                        |
| Multiplicity                                       | 9.1 (8.6)                           | 9.3 (8.9)                                          | 3.4 (3.4)                           | 3.5 (3.4)                                          |
| <b>Refinement</b>                                  |                                     |                                                    |                                     |                                                    |
| Resolution (Å)                                     |                                     | 72.31-2.01                                         |                                     | 146.24-2.85                                        |
| R <sub>work</sub> /R <sub>free</sub> /Test set (%) |                                     | 18.36 / 22.81 / 5.07                               |                                     | 19.44 / 21.18 / 4.98                               |
| No. monomers/A.S.U.                                |                                     | 2                                                  |                                     | 16                                                 |
| No. atoms                                          |                                     |                                                    |                                     |                                                    |
| Protein                                            |                                     | 7,720                                              |                                     | 61,333                                             |
| Nucleotide                                         |                                     | 184                                                |                                     | 1,504                                              |
| Ligand Fe                                          |                                     | 2                                                  |                                     | 16                                                 |
| Ligand Mg                                          |                                     | 6                                                  |                                     | 48                                                 |
| Ligand Mn                                          |                                     | 0                                                  |                                     | 0                                                  |
| Ligand SO4                                         |                                     | 0                                                  |                                     | 75                                                 |
| Water                                              |                                     | 128                                                |                                     | 0                                                  |
| B-factors (Å <sup>2</sup> )                        |                                     |                                                    |                                     |                                                    |
| Wilson                                             |                                     | 36.1                                               |                                     | 49.5                                               |
| Protein                                            |                                     | 44.9                                               |                                     | 71.0                                               |
| Nucleotide                                         |                                     | 34.4                                               |                                     | 43.7                                               |
| Ligand Fe                                          |                                     | 32.5                                               |                                     | 42.1                                               |
| Ligand Mg                                          |                                     | 41.4                                               |                                     | 27.2                                               |
| Ligand Mn                                          |                                     | -                                                  |                                     | -                                                  |
| Ligand SO4                                         |                                     | -                                                  |                                     | 112.7                                              |
| Water                                              |                                     | 35.3                                               |                                     | -                                                  |
| Average                                            |                                     | 44.4                                               |                                     | 70.4                                               |
| R.m.s. deviations                                  |                                     |                                                    |                                     |                                                    |
| Bond lengths (Å)                                   |                                     | 0.0202                                             |                                     | 0.0110                                             |
| Bond angles (°)                                    |                                     | 2.0239                                             |                                     | 1.5351                                             |
| Chiral volumes (Å <sup>3</sup> )                   |                                     | 0.1148                                             |                                     | 0.0848                                             |
| Ramachandran                                       |                                     |                                                    |                                     |                                                    |
| Favoured                                           |                                     | 911 (96.0%)                                        |                                     | 7,364 (96.8%)                                      |
| Allowed                                            |                                     | 37 (3.9%)                                          |                                     | 238 (3.1%)                                         |
| Outliers                                           |                                     | 1 (0.1%)                                           |                                     | 2 (0.03%)                                          |
| PDB code                                           |                                     | 6TX0                                               |                                     | 6TXA                                               |

**Supplementary Table 3 - continued**

|                                                    | wt-SAMHD1<br>Mg, GTP, dATP<br>dCMPNPP | wt-SAMHD1<br>Mg, GTP, dATP,<br>dCMPNPP<br>(STARANISO) | wt-SAMHD1<br>Mg, GTP, dATP,<br>dTMPNPP | wt-SAMHD1<br>Mg, GTP, dATP,<br>dTMPNPP<br>(STARANISO) |
|----------------------------------------------------|---------------------------------------|-------------------------------------------------------|----------------------------------------|-------------------------------------------------------|
| <b>Data collection</b>                             |                                       |                                                       |                                        |                                                       |
| Space group                                        | P 2 <sub>1</sub>                      | P 2 <sub>1</sub>                                      | P 2 <sub>1</sub>                       | P 2 <sub>1</sub>                                      |
| Cell dimensions                                    |                                       |                                                       |                                        |                                                       |
| a, b, c (Å)                                        | 99.3, 175.6, 277.7                    | 99.1, 175.2, 277.3                                    | 97.5, 172.2, 275.2                     | 97.5, 172.2, 275.3                                    |
| α, β, γ                                            | 90, 94.9, 90                          | 90, 94.8, 90                                          | 90, 95.3, 90                           | 90, 95.3, 90                                          |
| Wavelength (Å)                                     | 0.97625                               | 0.97625                                               | 0.97950                                | 0.97950                                               |
| Resolution (Å)                                     | 98.95(3.25)-3.19                      | 276.29(3.10)-2.84                                     | 88.93(3.76)-3.70                       | 91.36(3.63)-3.19                                      |
| Anisotropic diff. limits                           |                                       |                                                       |                                        |                                                       |
| a*, b*, c* (Å)                                     | -                                     | 2.82, 3.05, 3.48                                      | -                                      | 3.90, 4.60, 3.18                                      |
| Unique reflections                                 | 156,298 (7,098)                       | 161,935 (8,099)                                       | 96,051 (4,812)                         | 80,315 (4,016)                                        |
| R <sub>meas</sub> (%)                              | 17.1 (66)                             | 19.5 (102)                                            | 38.7 (113)                             | 46.7 (126)                                            |
| R <sub>pim</sub> (%)                               | 8.6 (33)                              | 9.7 (49)                                              | 14.7 (43)                              | 17.5 (47.6)                                           |
| CC <sub>1/2</sub>                                  | 0.843 (0.824)                         | 0.991 (0.595)                                         | 0.972 (0.818)                          | 0.960 (0.668)                                         |
| I/σ(I)                                             | 6.3 (2.0)                             | 7.1 (1.5)                                             | 4.8 (1.8)                              | 4.7 (1.7)                                             |
| Completeness                                       |                                       |                                                       |                                        |                                                       |
| Spherical (%)                                      | 99.5 (91.5)                           | 72.9 (15.8)                                           | 99.5 (98.8)                            | 53.2 (8.2)                                            |
| Ellipsoidal (%)                                    | -                                     | 93.7 (53.8)                                           | -                                      | 92.3 (76.2)                                           |
| Multiplicity                                       | 3.7 (3.7)                             | 3.9 (4.1)                                             | 6.8 (6.8)                              | 7.0 (6.7)                                             |
| <b>Refinement</b>                                  |                                       |                                                       |                                        |                                                       |
| Resolution (Å)                                     |                                       | 276.29-2.84                                           |                                        | 91.22-3.19                                            |
| R <sub>work</sub> /R <sub>free</sub> /Test set (%) |                                       | 22.80 / 24.89 / 4.98                                  |                                        | 21.79 / 25.18 / 5.00                                  |
| No. monomers/A.S.U.                                |                                       | 16                                                    |                                        | 16                                                    |
| No. atoms                                          |                                       |                                                       |                                        |                                                       |
| Protein                                            |                                       | 60,407                                                |                                        | 61,116                                                |
| Nucleotide                                         |                                       | 1,440                                                 |                                        | 1,456                                                 |
| Ligand Fe                                          |                                       | 16                                                    |                                        | 16                                                    |
| Ligand Mg                                          |                                       | 42                                                    |                                        | 32                                                    |
| Ligand Mn                                          |                                       | 0                                                     |                                        | 0                                                     |
| Ligand SO4                                         |                                       | 45                                                    |                                        | 55                                                    |
| Water                                              |                                       | 0                                                     |                                        | 0                                                     |
| B-factors (Å <sup>2</sup> )                        |                                       |                                                       |                                        |                                                       |
| Wilson                                             |                                       | 46.2                                                  |                                        | 50.1                                                  |
| Protein                                            |                                       | 54.6                                                  |                                        | 85.1                                                  |
| Nucleotide                                         |                                       | 59.8                                                  |                                        | 65.9                                                  |
| Ligand Fe                                          |                                       | 49.0                                                  |                                        | 47.9                                                  |
| Ligand Mg                                          |                                       | 57.9                                                  |                                        | 42.4                                                  |
| Ligand Mn                                          |                                       | -                                                     |                                        | -                                                     |
| Ligand SO4                                         |                                       | 112.7                                                 |                                        | 118.8                                                 |
| Water                                              |                                       | -                                                     |                                        | -                                                     |
| Average                                            |                                       | 54.3                                                  |                                        | 84.4                                                  |
| R.m.s. deviations                                  |                                       |                                                       |                                        |                                                       |
| Bond lengths (Å)                                   |                                       | 0.0132                                                |                                        | 0.0095                                                |
| Bond angles (°)                                    |                                       | 1.7023                                                |                                        | 1.4111                                                |
| Chiral volumes (Å <sup>3</sup> )                   |                                       | 0.0874                                                |                                        | 0.0729                                                |
| Ramachandran                                       |                                       |                                                       |                                        |                                                       |
| Favoured                                           |                                       | 7,272 (96.8%)                                         |                                        | 7,331 (96.5%)                                         |
| Allowed                                            |                                       | 238 (3.2%)                                            |                                        | 260 (3.4%)                                            |
| Outliers                                           |                                       | 3 (0.04%)                                             |                                        | 1 (0.01%)                                             |
| PDB code                                           |                                       | 6TXC                                                  |                                        | 6TXE                                                  |

### Supplementary Table 3 - continued

|                                                    | D137N-SAMHD1<br>Mn, XTP,<br>dAMPNPP | D137N-SAMHD1<br>Mn, Mg, XTP, dATP<br>dCMPNPP | H215A-SAMHD1<br>Mg, GTP,<br>dAMPNPP            |
|----------------------------------------------------|-------------------------------------|----------------------------------------------|------------------------------------------------|
| <b>Data collection</b>                             |                                     |                                              |                                                |
| Space group                                        | P 4 <sub>3</sub> 2 <sub>1</sub> 2   | P 4 <sub>3</sub> 2 <sub>1</sub> 2            | P 2 <sub>1</sub> 2 <sub>1</sub> 2 <sub>1</sub> |
| Cell dimensions                                    |                                     |                                              |                                                |
| a, b, c (Å)                                        | 105.0, 105.0, 195.5                 | 105.3, 105.3, 195.6                          | 137.4, 171.9, 179.6                            |
| α, β, γ                                            | 90, 90, 90                          | 90, 90, 90                                   | 90, 90, 90                                     |
| Wavelength (Å)                                     | 0.97866                             | 1.9075                                       | 0.97624                                        |
| Resolution (Å)                                     | 71.54(2.29)-2.25                    | 195.6(3.31)-3.25                             | 107.30(2.24)-2.20                              |
| Anisotropic diff. limits                           |                                     |                                              |                                                |
| a*, b*, c* (Å)                                     | -                                   | -                                            | -                                              |
| Unique reflections                                 | 51,603 (2,085)                      | 18,094 (885)                                 | 212,120 (8,698)                                |
| R <sub>meas</sub> (%)                              | 12.6 (131)                          | 20.4 (134)                                   | 19.7 (118)                                     |
| R <sub>pim</sub> (%)                               | 2.9 (46.0)                          | 5.3 (34.9)                                   | 7.4 (52.5)                                     |
| CC <sub>1/2</sub>                                  | 0.998 (0.673)                       | 0.997 (0.752)                                | 0.988 (0.517)                                  |
| I/σ(I)                                             | 14.5 (1.8)                          | 10.5 (2.1)                                   | 8.2 (1.5)                                      |
| Completeness                                       |                                     |                                              |                                                |
| Spherical (%)                                      | 97.75 (80.13)                       | 100.00 (99.44)                               | 98.7 (81.7)                                    |
| Ellipsoidal (%)                                    | -                                   | -                                            | -                                              |
| Multiplicity                                       | 16.8 (6.8)                          | 15.4 (15.4)                                  | 6.9 (4.8)                                      |
| <b>Refinement</b>                                  |                                     |                                              |                                                |
| Resolution (Å)                                     | 71.51-2.25                          | 92.72-3.25                                   | 107.30-2.20                                    |
| R <sub>work</sub> /R <sub>free</sub> /Test set (%) | 19.52 / 23.88 / 5.01                | 17.59 / 23.59 / 5.16                         | 17.64 / 20.24 / 4.96                           |
| No. monomers/A.S.U.                                | 2                                   | 2                                            | 8                                              |
| No. atoms                                          |                                     |                                              |                                                |
| Protein                                            | 7,748                               | 7,210                                        | 30,873                                         |
| Nucleotide                                         | 184                                 | 188                                          | 736                                            |
| Ligand Fe                                          | 2                                   | 2                                            | 8                                              |
| Ligand Mg                                          | 0                                   | 4                                            | 25                                             |
| Ligand Mn                                          | 6                                   | 2                                            | 0                                              |
| Ligand SO4                                         | 0                                   | 0                                            | 0                                              |
| Water                                              | 90                                  | 0                                            | 796                                            |
| B-factors (Å)                                      |                                     |                                              |                                                |
| Wilson                                             | 37.6                                | 86.2                                         | 24.4                                           |
| Protein                                            | 48.5                                | 109.6                                        | 31.5                                           |
| Nucleotide                                         | 43.5                                | 77.8                                         | 23.2                                           |
| Ligand Fe                                          | 41.4                                | 68.6                                         | 20.2                                           |
| Ligand Mg                                          | -                                   | 66.9                                         | 23.4                                           |
| Ligand Mn                                          | 49.0                                | 75.0                                         | -                                              |
| Ligand SO4                                         | -                                   | -                                            | -                                              |
| Water                                              | 32.8                                | -                                            | 23.7                                           |
| Average                                            | 47.9                                | 108.8                                        | 31.0                                           |
| R.m.s. deviations                                  |                                     |                                              |                                                |
| Bond lengths (Å)                                   | 0.0211                              | 0.0146                                       | 0.0211                                         |
| Bond angles (°)                                    | 2.0953                              | 1.8646                                       | 2.0922                                         |
| Chiral volumes (Å <sup>3</sup> )                   | 0.1222                              | 0.0974                                       | 0.1256                                         |
| Ramachandran                                       |                                     |                                              |                                                |
| Favoured                                           | 928 (97.7%)                         | 864 (93.5%)                                  | 3,718 (98.3%)                                  |
| Allowed                                            | 22 (2.3%)                           | 55 (6.0%)                                    | 66 (1.7%)                                      |
| Outliers                                           | 0 (0%)                              | 5 (0.5%)                                     | 0 (0%)                                         |
| PDB code                                           | 6TXF                                | 6YOM                                         | 6XU1                                           |

†Values in parentheses refer to the highest resolution shell



**Supplementary Table 4 nucleotide and metal contents of SAMHD1 structures**

| <b>Structure</b>                            | <b>AL1<br/>(nuc)</b> | <b>AL2<br/>(nuc)</b> | <b>AL1/AL2<br/>(metal)</b> | <b>Active site<br/>(nuc)</b> | <b>Active site<br/>(metal)</b> |
|---------------------------------------------|----------------------|----------------------|----------------------------|------------------------------|--------------------------------|
| D137N-SAMHD1, Mg, XTP,<br>dAMPNPP           | XTP                  | dAMPNPP              | Mg                         | dAMPNPP                      | Fe, Mg                         |
| D137N-SAMHD1, Mg, XTP,<br>dGMPNPP           | XTP                  | dGMPNPP              | Mg                         | dGMPNPP                      | Fe, Mg                         |
| wt-SAMHD1, Mg, GTP,<br>dATP, dCMPNPP        | GTP                  | dATP                 | Mg                         | dCMPNPP                      | Fe, Mg                         |
| wt-SAMHD1, Mg, GTP,<br>dATP, TMPNPP         | GTP                  | dATP                 | Mg                         | TMPNPP                       | Fe, Mg                         |
| D137N-SAMHD1, Mn, XTP,<br>dAMPNPP           | XTP                  | dAMPNPP              | Mn                         | dAMPNPP                      | Fe, Mn                         |
| D137N-SAMHD1, Mn, Mg,<br>XTP, dATP, dCMPNPP | XTP                  | dATP                 | Mg                         | dCMPNPP                      | Fe, Mn, Mg                     |
| H215A-SAMHD1, Mg,<br>GTP, dAMPNPP           | GTP                  | dAMPNPP              | Mg                         | dAMPNPP                      | Fe, Mg                         |

### Supplementary Table 5. Primers for SAMHD1 cloning and mutagenesis

| Construct                |     | Primers (5' - 3')**                                 |
|--------------------------|-----|-----------------------------------------------------|
| M1-M626<br>(full length) | FWD | <u>CAGGGACCCGGTATGCAGCGAGCCGATTCCGAGCAG</u>         |
|                          | REV | <u>GGCACCAGAGCGTTACATTGGGTCATCTTTAAAAAGCTG</u>      |
| Q109-M626                | FWD | <u>GGCCCCGGGCAAATCCACGTTGATACAATG</u>               |
|                          | REV | <u>GGCGCGGCCGCTCATCACATTGGGTCATCTTTAAAAAGCTGG</u>   |
| D137N                    | FWD | CTCGTCCGAATCATT <u>A</u> ATACACCTCAATTTCAAC         |
|                          | REV | GTTGAAATTGAGGTGTAT <u>T</u> AATGATTCGGACGAG         |
| H215A                    | FWD | GTCATGGGCCATTTTCT <u>GC</u> CATGTTTGATGGACGATTTATTC |
|                          | REV | GAATAAATCGTCCATCAAACATG <u>GC</u> AGAAAATGGCCCATGAC |
| H233A                    | FWD | GGAGGTGAAATGGACG <u>GC</u> TGAACAAGGCTCAGTTATG      |
|                          | REV | CATAACTGAGCCTTGTTCA <u>GC</u> CGTCCATTTACCTCC       |
| D218A                    | FWD | CCATTTTCTCACATGTTTG <u>C</u> TGGACGATTTATCCACTTG    |
|                          | REV | CAAGTGAATAAATCGTCCA <u>G</u> CAAACATGTGAGAAAATGG    |

\*LIC or restriction sites used for cloning are underlined

\*\*Mutagenized codons are highlighted and underlined
